# Supplementary material for: Intein based bioprocess for production of a synthetic antimicrobial peptide: an alternative route to solid phase peptide synthesis
Source: Royal Society of Chemistry journal article supplement (doi:10.1039/c4ra04056b), 2014-01-01
Supplement: c4ra04056b1.pdf [file c4ra04056b1.pdf]

### Supplementary Materials

#### **Intein based bioprocess for production of a synthetic antimicrobial peptide: An alternative route to solid phase peptide synthesis**

Anindya Basu,<sup>\*a</sup> Biswajit Mishra,<sup>a</sup> Sharmistha Dey,<sup>b</sup> and Susanna Su Jan Leong<sup>\*c,d</sup>

<sup>a</sup>School of Chemical and Biomedical Engineering, Nanyang Technological University, 62 Nanyang Drive, Singapore 637459

<sup>b</sup>Department of Biophysics, All India Institute of Medical Sciences, Ansari Nagar New Delhi 110029, India

<sup>c</sup>Singapore Institute of Technology, 10 Dover Drive, Singapore 138683

<sup>d</sup>Department of Biochemistry, Yong Loo Lin School of Medicine, National University of Singapore, 8 Medical Drive, Singapore 117597

\* Corresponding author:

Anindya Basu : e-mail address: [ceeab@nus.edu.sg](mailto:ceeab@nus.edu.sg); Tel: +65 65168482

and Susanna Su Jan Leong: email address: [Susanna.Leong@SingaporeTech.edu.sg](mailto:Susanna.Leong@SingaporeTech.edu.sg);

[bchslsj@nus.edu.sg](mailto:bchslsj@nus.edu.sg); Tel: +65 6592 8544;

Fax: +65 6592 1190

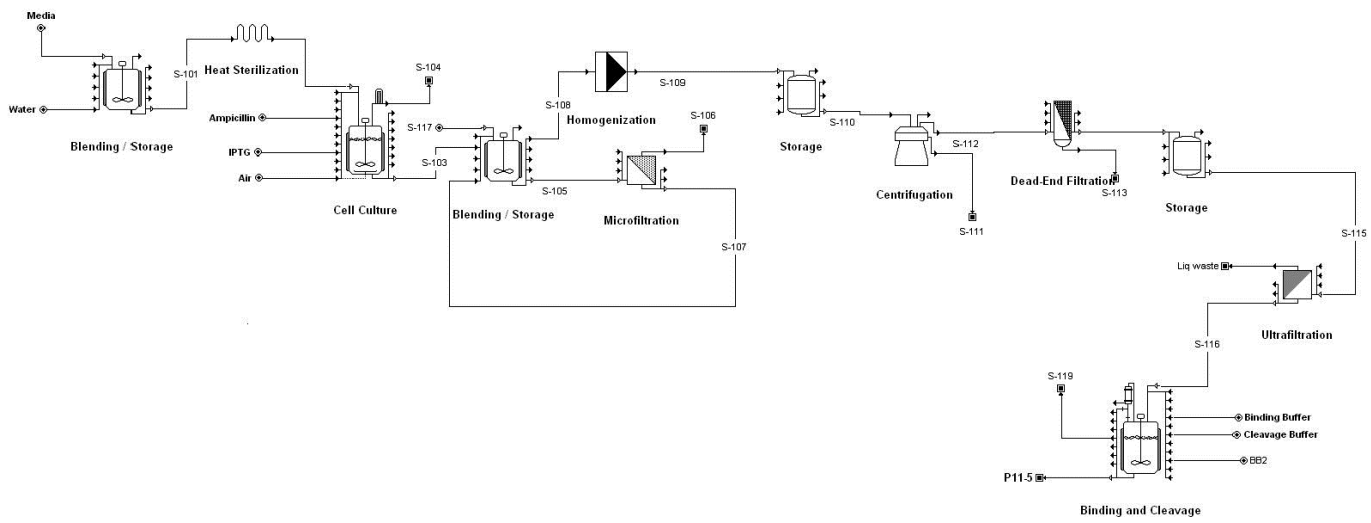

**Figure S1.** Schematic representation of the P11-5 production strategy using the intein bioprocessing platform.

**Table S1** Raw Material costs for the Intein Bioprocess

| <b>Bulk Material</b>                 | <b>Price (\$)</b> |
|--------------------------------------|-------------------|
| Ampicillin                           | 8.84 / g          |
| Disodium Edetate                     | 220 / Kg          |
| IPTG                                 | 78.72 / Kg        |
| Di-potassium mono hydrogen phosphate | 184 / Kg          |
| Potassium dihydrogen phosphate       | 96 / Kg           |
| Media                                | 88 / Kg           |
| Sodium Chloride                      | 33.28 / Kg        |
| Sodium Hydroxide                     | 114.64 / Kg       |
| Tris-chloride                        | 268.8 / Kg        |
| Tween 20                             | 103.60 / Kg       |

**Table S2** Raw Material costs for the SPPS strategy

| <b>Bulk Material</b> | <b>Unit Cost (\$)</b> |
|----------------------|-----------------------|
| Acetic Acid          | 0.15 / mL             |
| Anisole              | 139.38 / L            |
| DCM                  | 1.29 / L              |
| Diethyl Ether        | 8.33 / L              |
| DMF                  | 141.67 / L            |
| Ethyl Alcohol        | 71.67 / L             |
| Fmoc-L Resin         | 72.75 / g             |
| Fmoc-F               | 5.33 / g              |
| Fmoc-G               | 3.10 / g              |
| Fmoc-ILe             | 2.11 / g              |
| Fmoc-K               | 10.48 / g             |
| Fmoc-L               | 2.03 / g              |
| HBTU                 | 28.77 / g             |
| NMM                  | 619.17 / L            |
| Piperidine           | 323.75 / L            |
| TFA                  | 1.27 / mL             |

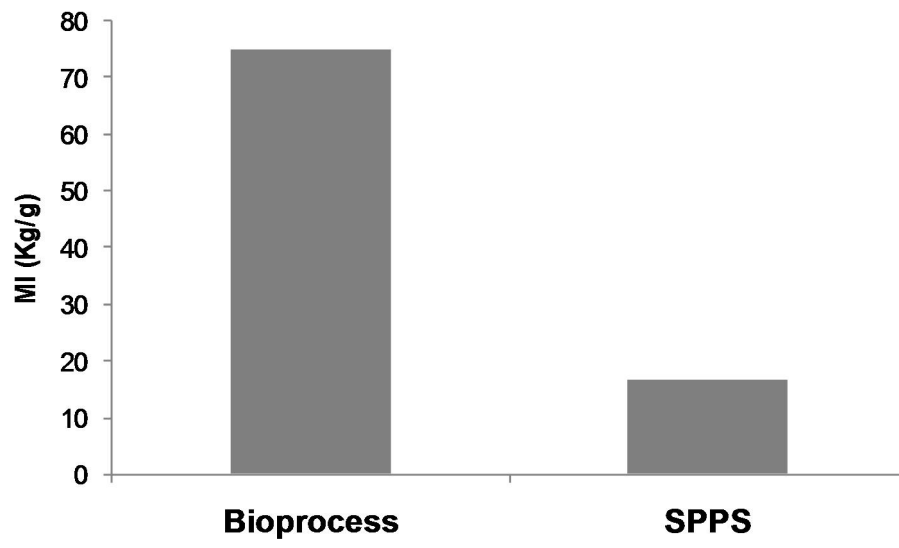

**Fig. S2** Input Mass Index (MI) for the SPPS and intein bioprocessing strategies.
